# Supplementary material
Source: publisher figshare collection journal article supplement (https://acs.figshare.com/ndownloader/files/5742948)
Supplement: Supplementary file 1 [file 5742948]

## Supplemental Information

Title: Nitrite catalyzes ferriheme protein reductive nitrosylation

Authors: Bernadette O. Fernandez, Peter C. Ford

Figure S1

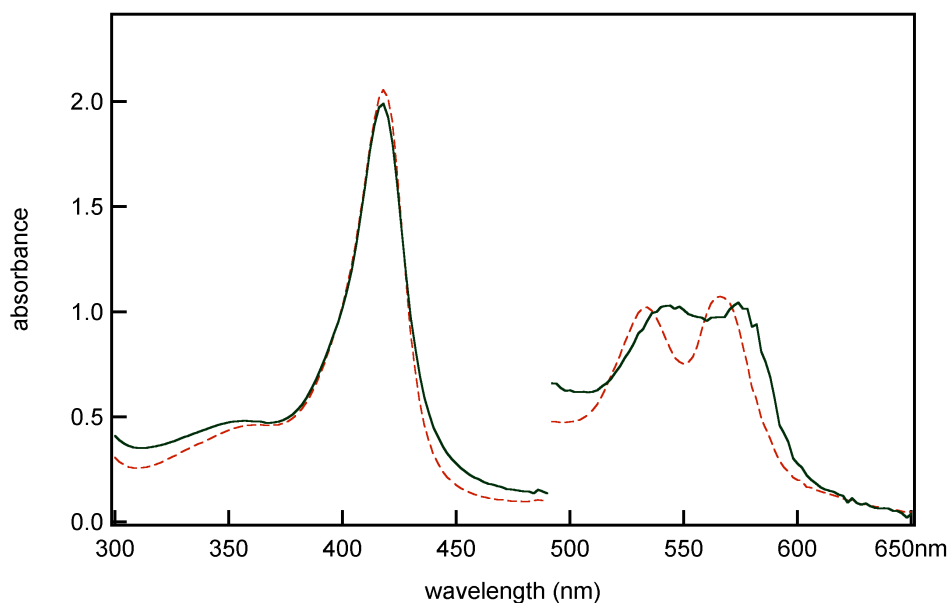

**Figure S1.** The dashed line represents the first spectrum recorded (after about 3 minutes) after mixing a solution of methHb ( $7.23 \times 10^{-6}$  M without any additional  $\text{NaNO}_2$  in pH 7.0  $\text{NaH}_2\text{PO}_4/\text{Na}_2\text{HPO}_4$  buffered solution at 298 K ( $\square = 0.15$ ) with NO to give  $[\text{NO}] = 1.8$  mM. The solid line represents the final spectrum  $[\text{Hb}(\text{NO})]$  after 3000 s reaction time.
